# Supplementary material
Source: publisher figshare collection journal article supplement (https://springernature.figshare.com/ndownloader/files/12758165)

Figure S3

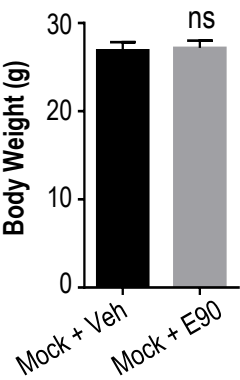

Supplement: Supplementary file [file 12758165]
